# Supplementary material for: Eyes wide shut: Transcranial alternating current stimulation drives alpha rhythm in a state dependent manner
Source: Springer Nature journal article supplement (doi:10.1038/srep27138), 2016-06-02
Supplement: 41598_2016_BFsrep27138_MOESM1_ESM.pdf [file 41598_2016_BFsrep27138_MOESM1_ESM.pdf]

1 Supplementary information

2

3

4 **Eyes wide shut: Transcranial alternating current stimulation**  
5 **drives alpha rhythm in a state dependent manner**

6

7

8 Philipp Ruhnau<sup>1,2\*</sup>, Toralf Neuling<sup>1,2</sup>, Marco Fuscá<sup>1</sup>, Christoph S. Herrmann<sup>3,4</sup>,  
9 Gianpaolo Demarchi<sup>1,2</sup>, Nathan Weisz<sup>1,2</sup>

10 1 - Center for Mind/Brain Sciences, University of Trento, via delle Regole 101,  
11 38123 Mattarello, Italy

12 2 - Centre for Cognitive Neuroscience, University of Salzburg, Hellbrunnerstraße  
13 34, 5020 Salzburg, Austria

14 3 - Experimental Psychology Lab, Center for Excellence "Hearing4all," European  
15 Medical School, University of Oldenburg, 26111 Oldenburg, Germany

16 4 - Research Center Neurosensory Science, University of Oldenburg, Carl-von-  
17 Ossietzky-Strasse 9-11, 26129 Oldenburg, Germany

18

19 \* Corresponding author:

20 Philipp Ruhnau

21 Paris-Lodron University Salzburg

22 Division of Physiological Psychology

23 Hellbrunnerstraße 34

24 5020 Salzburg, Austria

25 Email: [mail@philipp-ruhnau.de](mailto:mail@philipp-ruhnau.de)

1 **Supplementary information**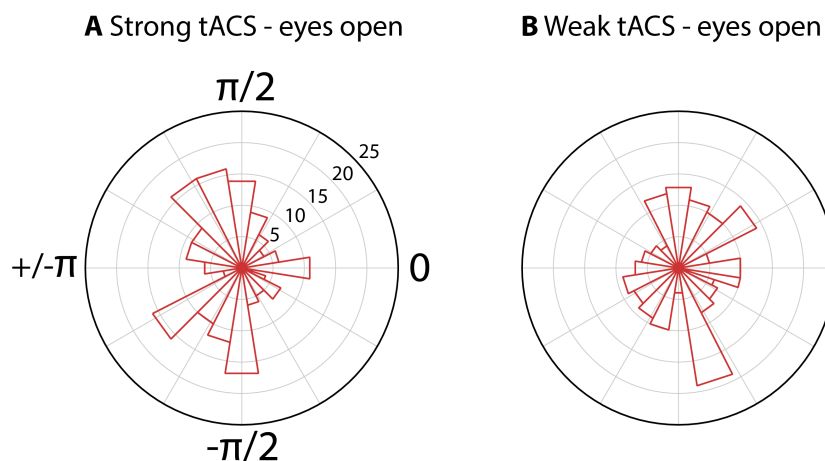

2

3 Figure S1 – Histograms of phase lag tACS to brain activity in the virtual sensors in visual  
 4 cortex. Phase lag was estimated by computing the angle of the phase differences  
 5 between tACS and brain activity. Considerable between-subject variation is evident with  
 6 both tACS intensities.

7

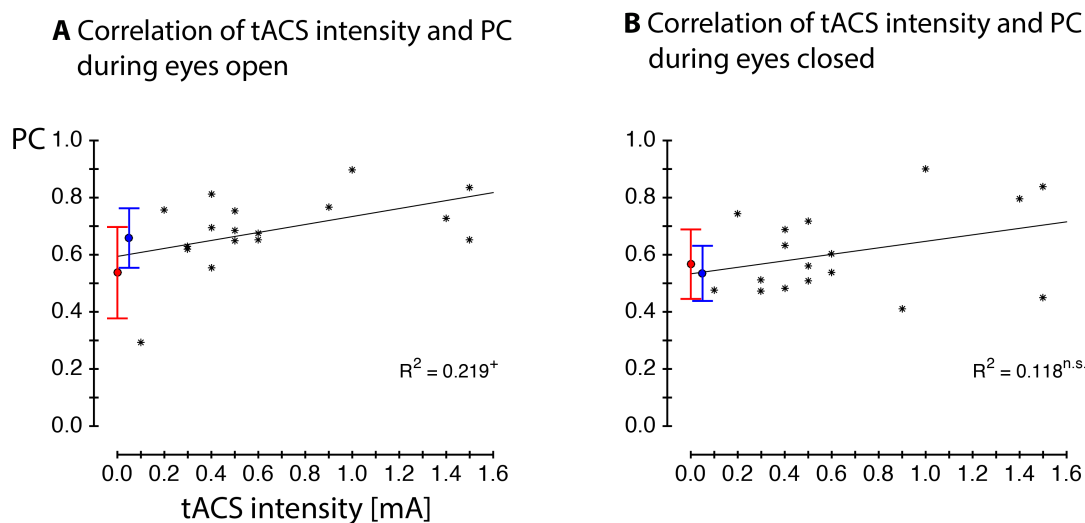

8

9 Figure S2 – Correlation of tACS intensity with PC in visual cortex in the strong tACS  
 10 condition. A trend for a linear relationship is present in the eyes open resting state. Our  
 11 data were not set to investigate this relationship – tACS intensity was not varied within  
 12 subjects and many subjects cluster around a similar intensity of  $\sim 0.5$  mA; however,  
 13 these data are in line with previous data showing increasing tACS after-effects with  
 14 increasing intensity and can be taken as a first indicator of the neuronal entrainment  
 15 effects during tACS. The error bar at zero (red) represents mean PC and standard  
 16 deviation in the sham condition. The error bar at 0.05 mA (blue) represents mean and  
 17 standard deviation in the weak tACS condition.

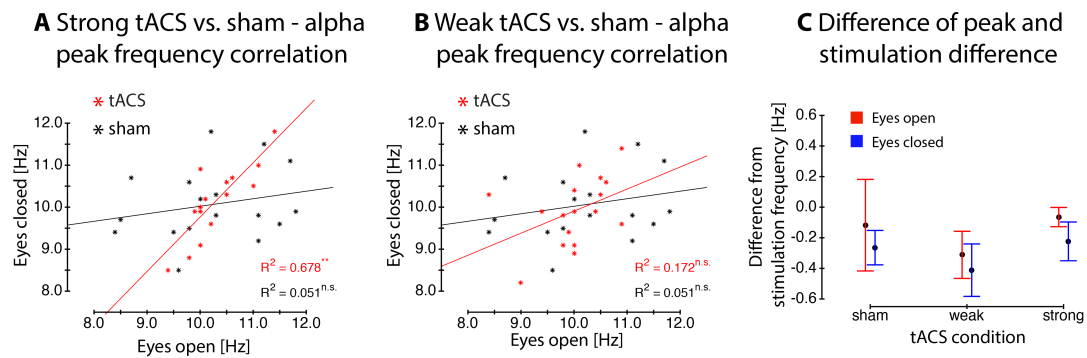

1

2 Figure S3 – Correlation of eyes open and eyes closed individual alpha frequency (here  
 3 defined as maximum power value in the spectrum between 8 and 12 Hz in visual cortex  
 4 virtual sensors). Panel A shows the correlation for sham and strong tACS and panel B for  
 5 sham and weak tACS. During sham and weak tACS the correlation is not significant,  
 6 probably also because of large variation during the eyes open resting state, which makes  
 7 a reliable estimate difficult. As a result from entrainment the linear relationship is highly  
 8 significant with strong tACS. Panel C shows the difference of peak frequency in all  
 9 conditions from tACS stimulation frequency. Again, the eyes open sham condition shows  
 10 strongest variation, which is highly reduced in the strong tACS condition.

11

1 Table S1 – Individual stimulation parameter and temporal lag.

2 IAF = individual alpha frequency, int = stimulation intensity, Z = impedance, tLag =

3 temporal lag in the eyes open condition.

4 Correlations of tACS intensity with tLag:

5 weak tACS condition –  $r = 0.19$ ,  $p = 0.45$ ;

6 strong tACS condition –  $r = 0.043$ ,  $p = 0.87$

| Subject | IAF (Hz) | intensity<br>(mA) | Z(k $\Omega$ ) | tLag (ms) –<br>strong tACS | tLag (ms) –<br>weak tACS |
|---------|----------|-------------------|----------------|----------------------------|--------------------------|
| 01      | 10       | 1.0               | 4.3            | 32                         | -43                      |
| 02      | 9        | 0.6               | 2.8            | 12                         | 34                       |
| 03      | 10       | 0.4               | 4.3            | 34                         | 43                       |
| 04      | 10       | 0.5               | 9.0            | -44                        | -18                      |
| 05      | 10       | 0.9               | 14             | -21                        | -28                      |
| 06      | 10.5     | 0.6               | 9.8            | 15                         | -27                      |
| 07      | 10.5     | 0.5               | 2.4            | -31                        | -34                      |
| 08      | 10       | 0.4               | 4.0            | 19                         | 1                        |
| 09      | 10       | 1.5               | 5.9            | 33                         | 16                       |
| 10      | 11       | 0.5               | 4.9            | 40                         | -14                      |
| 11      | 11.5     | 0.1               | 7.0            | -27                        | -8                       |
| 12      | 10       | 0.4               | 9.9            | 7                          | -41                      |
| 13      | 11.5     | 1.5               | 6.7            | 35                         | -7                       |
| 14      | 10.5     | 0.2               | 4.2            | -14                        | -18                      |
| 15      | 10       | 0.3               | 3.9            | -25                        | 19                       |
| 16      | 10       | 0.3               | 6.1            | 12                         | -3                       |
| 17      | 10       | 1.4               | 2.7            | 28                         | -21                      |

7
